# Supplementary material for: Impact of 4th of July Fireworks on Spatiotemporal PM2.5 Concentrations in California Based on the PurpleAir Sensor Network: Implications for Policy and Environmental Justice
Source: MDPI journal article supplement (doi:10.3390/ijerph18115735), 2021-05-27

**Impact of 4th of July fireworks on spatiotemporal PM<sub>2.5</sub> concentrations in California  
based on the PurpleAir sensor network: Implications for Policy and Environmental  
Justice**

Table S1. Summary of the percent of counties with clear, some and no immediate impact of July 4<sup>th</sup> firework emissions on PM<sub>2.5</sub> concentrations. Potential associations for each county were examined between patterns of hourly average PM<sub>2.5</sub> peaks and impact from firework display events using normalized concentration based on hourly levels before fireworks displays (i.e., 7pm 3<sup>rd</sup> July -7pm 4<sup>th</sup> July).

| Year | Clear impact | Some impact | No immediate impact |
|------|--------------|-------------|---------------------|
| 2019 | 31.2%        | 36.2%       | 32.6%               |
| 2020 | 57.3%        | 24.5%       | 18.2%               |

Table S2. County-wide mean PM<sub>2.5</sub> concentrations on July 4-5<sup>th</sup> across the state in a) 2019 and b) 2020. Counties are sorted based on high-to-low mean PM<sub>2.5</sub> concentration. Rank column shows the ranking of the county in terms of population across the state. Percentage increase more than 100 are highlighted in both tables. Cells with “NA” indicate that there were no sensors available in these counties.

a)

| County          | Control days average | 4-5th July average | Percentage Increase (%) to baseline | County Rank in population |
|-----------------|----------------------|--------------------|-------------------------------------|---------------------------|
| Los Angeles     | 19.1                 | 29.9               | 56.4                                | 1                         |
| Riverside       | 18.4                 | 26.9               | 46.5                                | 4                         |
| Ventura         | 13.2                 | 16.9               | 28.3                                | 13                        |
| Orange          | 12.2                 | 14.1               | 15.2                                | 3                         |
| San Diego       | 11.5                 | 11.7               | 1.4                                 | 2                         |
| Santa Barbara   | 9.4                  | 12.0               | 27.8                                | 20                        |
| Tulare          | 8.6                  | 15.0               | 74.4                                | 18                        |
| Sonoma          | 8.6                  | 15.9               | 84.3                                | 17                        |
| Imperial        | 7.9                  | 7.6                | -4.8                                | 30                        |
| Kern            | 7.3                  | 16.9               | 132.7                               | 11                        |
| Alameda         | 7.1                  | 12.7               | 79.6                                | 7                         |
| San Francisco   | 7.0                  | 9.0                | 27.3                                | 12                        |
| San Bernardino  | 6.8                  | 11.0               | 61.3                                | 5                         |
| Nevada          | 6.4                  | 9.4                | 48.1                                | 36                        |
| San Luis Obispo | 6.3                  | 8.2                | 29.9                                | 23                        |
| Fresno          | 6.2                  | 14.7               | 136.1                               | 10                        |
| Contra Costa    | 5.9                  | 10.4               | 75.9                                | 9                         |
| Del Norte       | 5.9                  | 8.2                | 39.8                                | 49                        |
| Santa Clara     | 5.6                  | 11.0               | 96.1                                | 6                         |
| San Benito      | 5.6                  | 15.4               | 174.7                               | 42                        |
| Napa            | 5.5                  | 9.1                | 64.5                                | 34                        |
| Monterey        | 5.5                  | 9.2                | 65.9                                | 21                        |
| Solano          | 5.4                  | 8.7                | 62.8                                | 19                        |
| Glenn           | 5.3                  | 13.9               | 161.7                               | 48                        |

|             |     |      |       |    |
|-------------|-----|------|-------|----|
| Sutter      | 5.3 | 15.1 | 186.2 | 37 |
| Mariposa    | 5.2 | 8.2  | 55.9  | 53 |
| Santa Cruz  | 5.1 | 8.6  | 68.3  | 25 |
| Madera      | 5.1 | 7.3  | 44.3  | 32 |
| San Mateo   | 5.0 | 7.8  | 55.3  | 14 |
| Butte       | 5.0 | 9.7  | 94.2  | 28 |
| Sacramento  | 4.8 | 10.6 | 121.2 | 8  |
| Yuba        | 4.8 | 10.5 | 120.5 | 39 |
| Stanislaus  | 4.8 | 13.1 | 176.7 | 16 |
| Yolo        | 4.7 | 10.6 | 126.8 | 27 |
| Marin       | 4.6 | 6.4  | 38.2  | 26 |
| Placer      | 4.4 | 9.4  | 110.5 | 22 |
| Humboldt    | 4.4 | 5.3  | 21.1  | 35 |
| Tehama      | 4.3 | 10.2 | 137.4 | 40 |
| Merced      | 4.3 | 9.3  | 116.2 | 24 |
| Amador      | 4.0 | 7.8  | 93.5  | 46 |
| Tuolumne    | 4.0 | 6.8  | 70.5  | 43 |
| Shasta      | 3.9 | 6.0  | 52.5  | 31 |
| San Joaquin | 3.9 | 9.6  | 143.3 | 15 |
| El Dorado   | 3.9 | 7.0  | 81.1  | 29 |
| Mendocino   | 3.8 | 5.7  | 48.6  | 38 |
| Calaveras   | 3.8 | 6.5  | 74.1  | 44 |
| Plumas      | 3.7 | 6.8  | 82.0  | 51 |
| Trinity     | 3.5 | 7.1  | 106.8 | 55 |
| Modoc       | 3.3 | 5.8  | 74.5  | 56 |
| Lake        | 3.3 | 5.9  | 79.2  | 41 |
| Mono        | 3.2 | 3.8  | 17.8  | 54 |
| Siskiyou    | 3.1 | 5.6  | 79.1  | 45 |
| Lassen      | 2.8 | 5.2  | 84.3  | 47 |
| Inyo        | 2.7 | 3.3  | 18.9  | 52 |
| Alpine      | 2.2 | 5.1  | 129.2 | 58 |
| Sierra      | NA  | NA   | NA    | 57 |
| Colusa      | NA  | NA   | NA    | 50 |
| Kings       | NA  | NA   | NA    | 33 |

b)

| County          | Control days average | 4-5th July average | Percentage Increase (%) to baseline | County Rank in population |
|-----------------|----------------------|--------------------|-------------------------------------|---------------------------|
| San Luis Obispo | 22.6                 | 29.7               | 31.5                                | 23                        |
| Los Angeles     | 14.3                 | 42.6               | 197.3                               | 1                         |

|                |      |      |       |    |
|----------------|------|------|-------|----|
| Calaveras      | 13.5 | 15.5 | 15.4  | 44 |
| Riverside      | 13.4 | 15.4 | 15.0  | 4  |
| Ventura        | 11.7 | 17.5 | 50.4  | 13 |
| San Diego      | 10.7 | 13.9 | 29.6  | 2  |
| Orange         | 10.1 | 17.3 | 71.3  | 3  |
| Santa Clara    | 9.9  | 18.2 | 82.8  | 6  |
| Imperial       | 9.3  | 4.7  | -49.6 | 30 |
| Tulare         | 8.8  | 17.2 | 94.9  | 18 |
| Santa Barbara  | 8.7  | 18.8 | 116.3 | 20 |
| Del Norte      | 7.8  | 15.9 | 104.8 | 49 |
| Tehama         | 7.1  | 14.0 | 97.2  | 40 |
| San Francisco  | 6.9  | 15.8 | 128.0 | 12 |
| Kern           | 6.6  | 17.9 | 170.0 | 11 |
| San Bernardino | 6.5  | 7.7  | 18.0  | 5  |
| Contra Costa   | 6.5  | 16.1 | 148.1 | 9  |
| Fresno         | 6.5  | 13.9 | 114.3 | 10 |
| Mariposa       | 6.4  | 6.9  | 6.8   | 53 |
| Alameda        | 6.3  | 21.3 | 240.3 | 7  |
| Monterey       | 5.6  | 12.1 | 117.0 | 21 |
| San Mateo      | 5.5  | 14.9 | 169.1 | 14 |
| Sonoma         | 5.2  | 14.3 | 172.8 | 17 |
| Madera         | 5.1  | 5.8  | 12.9  | 32 |
| Sutter         | 5.1  | 20.9 | 307.3 | 37 |
| San Benito     | 5.1  | 19.9 | 288.2 | 42 |
| Santa Cruz     | 4.9  | 12.1 | 147.3 | 25 |
| Napa           | 4.8  | 12.3 | 158.6 | 34 |
| Sacramento     | 4.7  | 17.9 | 277.7 | 8  |
| Yuba           | 4.7  | 12.2 | 160.0 | 39 |
| Merced         | 4.7  | 12.5 | 166.6 | 24 |
| Butte          | 4.7  | 10.0 | 113.2 | 28 |
| Glenn          | 4.7  | 12.1 | 159.7 | 48 |
| Solano         | 4.6  | 14.3 | 207.6 | 19 |
| Humboldt       | 4.5  | 8.5  | 88.5  | 35 |
| Yolo           | 4.3  | 14.2 | 228.6 | 27 |
| Marin          | 4.2  | 11.7 | 176.7 | 26 |
| Stanislaus     | 4.2  | 17.3 | 315.1 | 16 |
| Mendocino      | 4.0  | 11.0 | 178.9 | 38 |
| San Joaquin    | 3.9  | 13.9 | 253.0 | 15 |
| Placer         | 3.9  | 9.5  | 141.6 | 22 |
| El Dorado      | 3.7  | 5.4  | 44.7  | 29 |
| Plumas         | 3.7  | 4.3  | 16.6  | 51 |
| Nevada         | 3.6  | 3.4  | -5.2  | 36 |

|          |     |      |       |    |
|----------|-----|------|-------|----|
| Amador   | 3.6 | 9.4  | 161.5 | 46 |
| Tuolumne | 3.4 | 4.9  | 43.3  | 43 |
| Inyo     | 3.3 | 3.1  | -5.5  | 52 |
| Mono     | 3.1 | 1.8  | -44.0 | 54 |
| Shasta   | 3.0 | 7.4  | 146.6 | 31 |
| Lake     | 2.9 | 7.3  | 153.9 | 41 |
| Modoc    | 2.8 | 8.9  | 221.1 | 56 |
| Trinity  | 2.6 | 9.6  | 275.5 | 55 |
| Siskiyou | 2.5 | 11.9 | 371.7 | 45 |
| Lassen   | 2.3 | 3.3  | 44.7  | 47 |
| Alpine   | 2.2 | 1.4  | -36.2 | 58 |
| Sierra   | NA  | NA   | NA    | 57 |
| Colusa   | NA  | NA   | NA    | 50 |
| Kings    | NA  | NA   | NA    | 33 |

Table S3. List of counties in which fireworks are prohibited county-wide.

| <b>County name</b> | <b>Population/mile<sup>2</sup></b> | <b>Region</b>       |
|--------------------|------------------------------------|---------------------|
| San Francisco      | 17,179                             | Northern California |
| Contra Costa       | 1,465                              | Northern California |
| San Diego          | 736                                | Southern California |
| Marin              | 485                                | Northern California |
| Napa               | 182                                | Northern California |
| El Dorado          | 106                                | Northern California |
| Nevada             | 103                                | Northern California |
| Shasta             | 47                                 | Northern California |
| Mendocino          | 25                                 | Northern California |
| Tuolumne           | 25                                 | Central California  |
| Mariposa           | 13                                 | Central California  |
| Plumas             | 8                                  | Northern California |
| Trinity            | 4                                  | Northern California |
| Sierra             | 3                                  | Northern California |
| Alpine             | 2                                  | Northern California |

Table S4. a) Single factor ANOVA T-test result based on city-based meteorology data (temperature, wind speed, relative humidity, and rainfall depth) for both 2019 and 2020 from National Oceanic and Atmospheric Administration (NOAA). b) Pearson correlation coefficients between PM<sub>2.5</sub> and each of the meteorological factors across the state in non-control days

a)

| <u>Control vs on-control</u>            | Temptrure (F) |          | Relative Humidity (%) |          | Wind Speed (m/s) |          | Rain Depth (inch) |          |
|-----------------------------------------|---------------|----------|-----------------------|----------|------------------|----------|-------------------|----------|
| Groups                                  | No-control    | Control  | No-control            | Control  | No-control       | Control  | No-control        | Control  |
| Count                                   | 492           | 492      | 492                   | 492      | 492              | 492      | 492               | 492      |
| Average                                 | 74            | 72       | 52                    | 57       | 0.08             | 0.07     | 0.02              | 0.05     |
| Variance                                | 24            | 30       | 14                    | 17       | 0.03             | 0.04     | 0.01              | 0.03     |
| P-value                                 | 0.12          |          | 0.23                  |          | 0.35             |          | 0.78              |          |
| <u>Regional during non-control days</u> |               |          |                       |          |                  |          |                   |          |
| Groups                                  | NorthCal      | SouthCal | NorthCal              | SouthCal | NorthCal         | SouthCal | NorthCal          | SouthCal |
| Count                                   | 278           | 214      | 278                   | 214      | 278              | 214      | 278               | 214      |
| Average                                 | 79            | 81       | 62                    | 58       | 0.08             | 0.07     | 0.06              | 0.03     |
| Variance                                | 26            | 35       | 12                    | 10       | 0.03             | 0.02     | 0.01              | 0.01     |
| P-value                                 | 0.09          |          | 0.21                  |          | 0.23             |          | 0.12              |          |
| <u>Yearly during no-control days</u>    |               |          |                       |          |                  |          |                   |          |
| Groups                                  | 2019          | 2020     | 2019                  | 2020     | 2019             | 2020     | 2019              | 2020     |
| Count                                   | 492           | 492      | 492                   | 492      | 492              | 492      | 492               | 492      |
| Average                                 | 73            | 74       | 49                    | 52       | 0.07             | 0.08     | 0.03              | 0.02     |
| Variance                                | 27            | 24       | 10                    | 14       | 0.03             | 0.03     | 0.02              | 0.01     |
| P-value                                 | 0.23          |          | 0.35                  |          | 0.17             |          | 0.56              |          |

b)

|                   | PM2.5       | Temptrature | Wind speed | Rainfall Depth | Relative Humidity |
|-------------------|-------------|-------------|------------|----------------|-------------------|
| PM2.5             | 1           |             |            |                |                   |
| Temperature       | <b>0.34</b> | 1           |            |                |                   |
| Wind speed        | -0.23       | 0.03        | 1          |                |                   |
| Rainfall Depth    | -0.36       | -0.41       | -0.12      | 1              |                   |
| Relative Humidity | 0.12        | -0.23       | 0          | <b>0.57</b>    | 1                 |

Figure S1. Outdoor operational PurpleAir sensor distribution in mid-June to mid-July 2019.

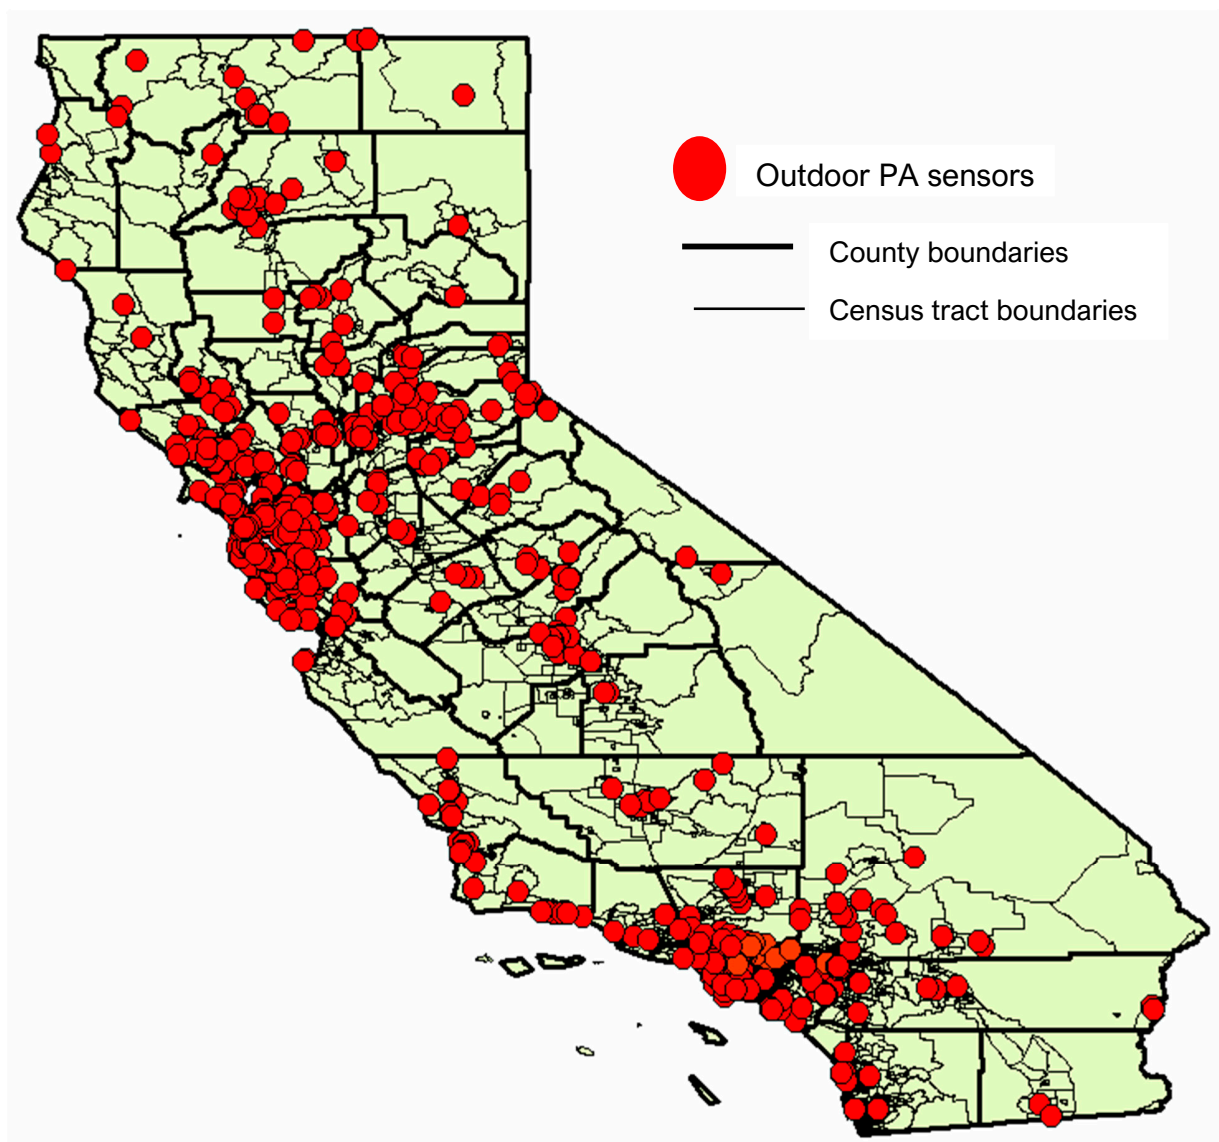



Figure S2. State-average daily filter-based selected trace metal concentrations during 4th July firework episode in 2019. Data includes average selected trace metal (more than 75% of data during July 1-August 1 2018 and 2019) concentration from 10 operating sites (out of 26 sites) in Chemical Speciation Network (CSN) across California during June-August 2018-2019.

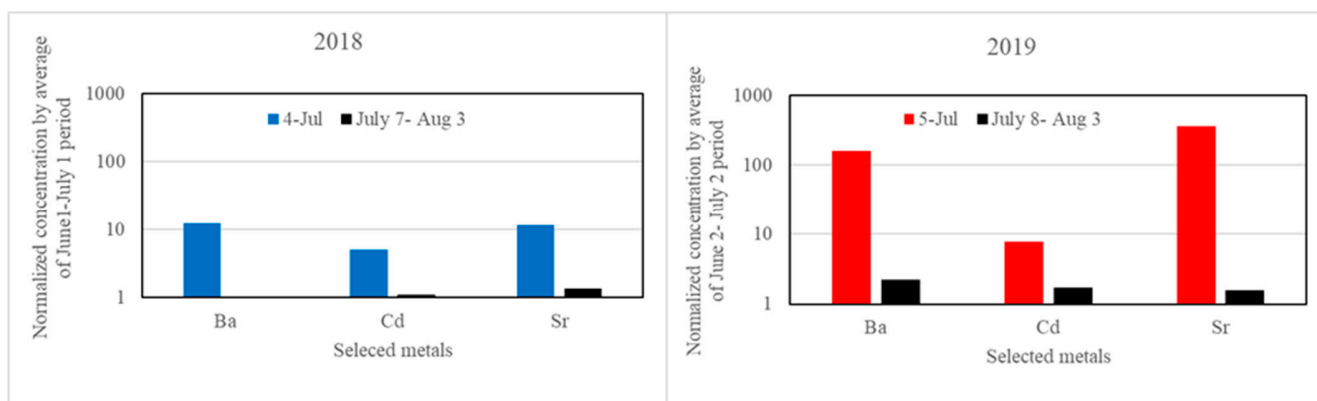

Figure S3. Temporal variation of summary PM<sub>2.5</sub> concentrations across counties with lowest, highest and median during 4<sup>th</sup> of July firework episode in both a) 2019 and b) 2020. Red and blue lines indicate temporal variation of daily PM<sub>2.5</sub> for the counties with highest and lowest 4-5<sup>th</sup> July average PM<sub>2.5</sub> concentration, respectively. Dashed line in each figure shows the median of the daily PM<sub>2.5</sub> levels across the 52 counties.

a)

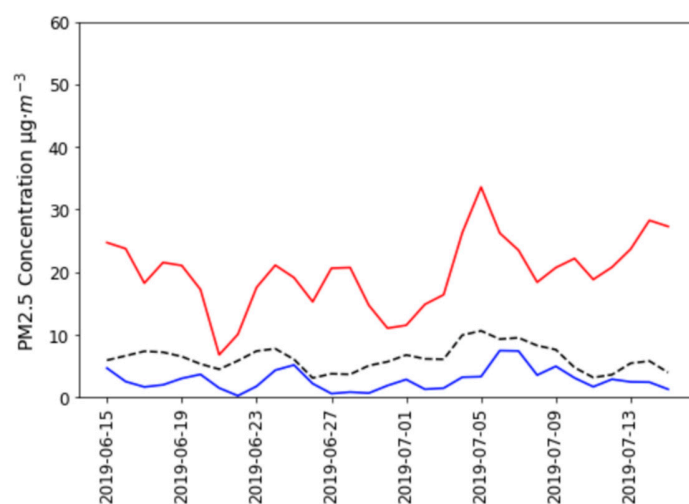

b)

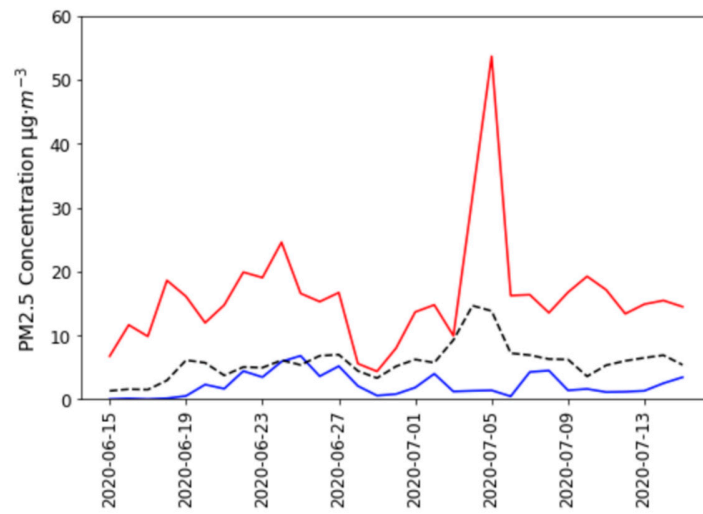

Figure S4. a) Spatial distribution of daily average  $\text{PM}_{2.5}$  concentration on July 4-5th and b) hotspot areas across California in 2020 based on PurpleAir sensors that were in operation since June 2019 *versus* all the active ones since June 2020.

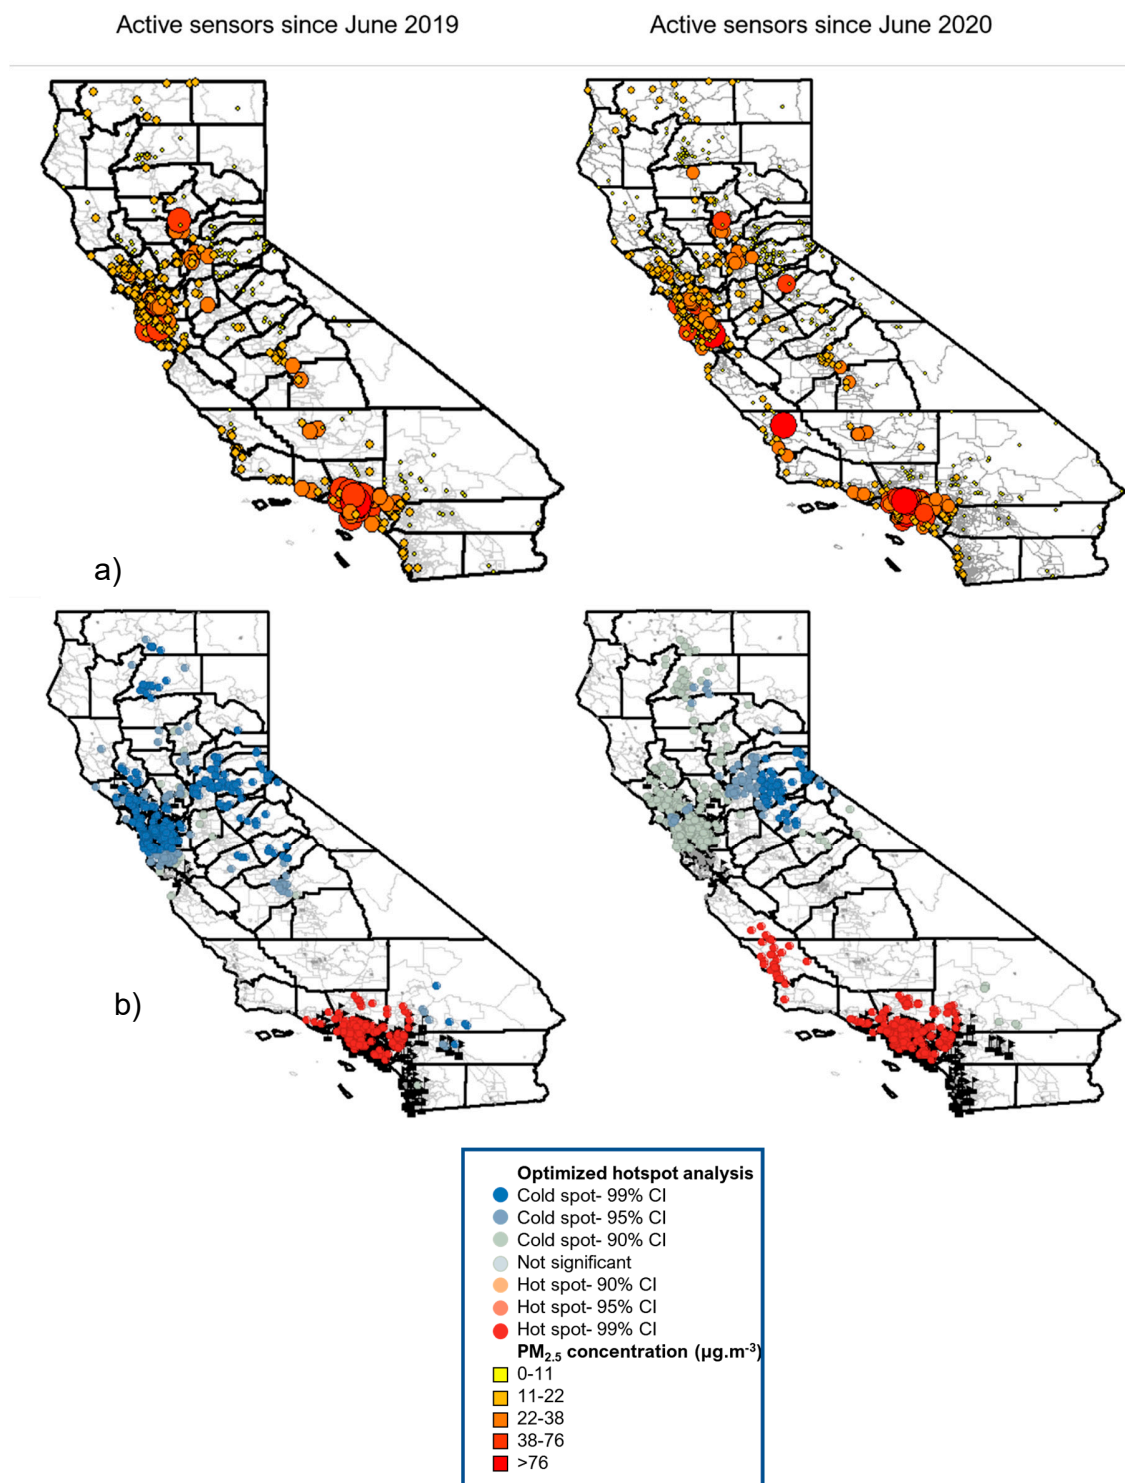

Figure S5. Average temporal variation of hourly PM<sub>2.5</sub> elevation based on non-control days hourly averages for near to regular firework location (near source), near freeway and the remaining sensors.

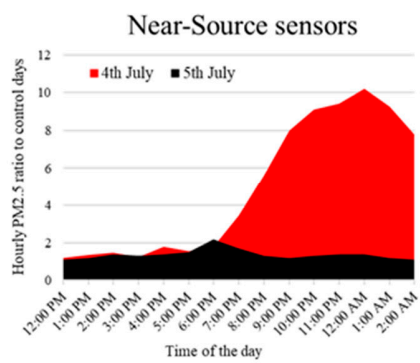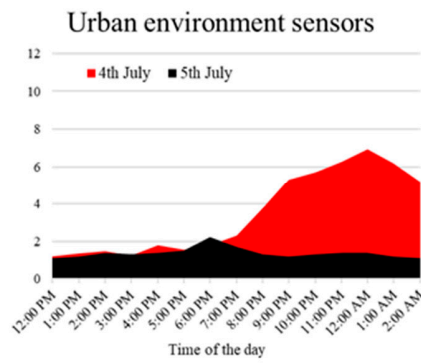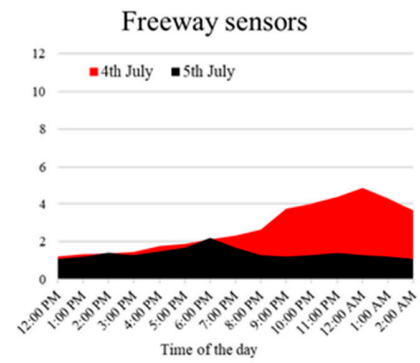

Supplement: s1 [file s1]
